# Supplementary material
Source: ML conference proceedings conference paper supplement (https://openaccess.thecvf.com/content/ICCV2021/html/Xiong_Self-Supervised_Representation_Learning_ICCV_2021_paper.html)
Supplement: Supplementary file 3 [file Xiong_Self-Supervised_Representation_Learning_ICCV_2021_supplemental.zip]

Archive with 3 entries (3 files):
- 08051-supp.pdf
- __MACOSX/._08051-supp.pdf
- flowe-cityscapes-demo.mp4
